# Supplementary material
Source: PubMed Central journal article supplement (PMC8373659)
Supplement: mmc1.pdf [file mmc1.pdf]

**Supplemental information**

**A potently neutralizing SARS-CoV-2 antibody  
inhibits variants of concern by utilizing unique  
binding residues in a highly conserved epitope**

**Laura A. VanBlargan, Lucas J. Adams, Zhuoming Liu, Rita E. Chen, Pavlo Gilchuk, Saravanan Raju, Brittany K. Smith, Haiyan Zhao, James Brett Case, Emma S. Winkler, Bradley M. Whitener, Lindsay Droit, Ishmael D. Aziati, Traci L. Bricker, Astha Joshi, Pei-Yong Shi, Adrian Creanga, Amarendra Pegu, Scott A. Handley, David Wang, Adrianus C.M. Boon, James E. Crowe Jr., Sean P.J. Whelan, Daved H. Fremont, and Michael S. Diamond**

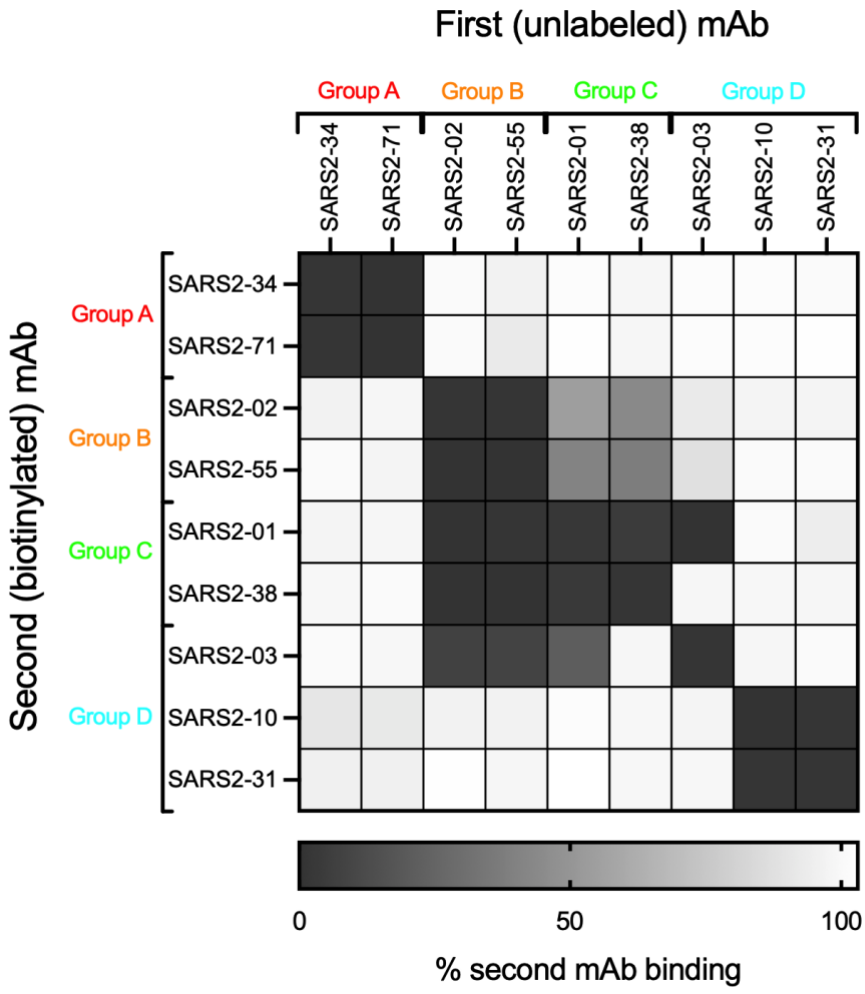

**Figure S1. Competition profile of mAb panel, Related to Figure 1.** A subset of mAbs from each reference mAb competition group were tested for competition for SARS-CoV-2 spike binding against each other. Data represent mean of technical duplicates.

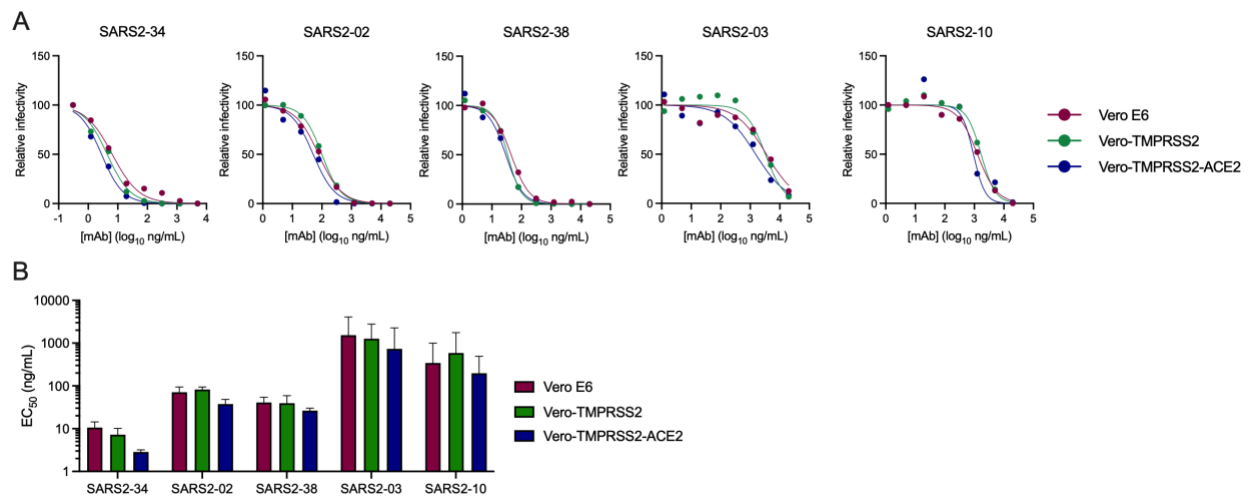

**Figure S2. Neutralization by anti-SARS-CoV-2 mAbs on different cell substrates, Related to Figure 2.** Anti-SARS-CoV-2 mAbs were assayed for neutralization by FRNT against SARS-CoV-2 using Vero E6, Vero-TMPRSS2, Vero-TMPRSS2-ACE2. (A) Representative dose response curves are shown. (B) Mean EC<sub>50</sub> values are shown; Error bars represent SEM from three experiments.

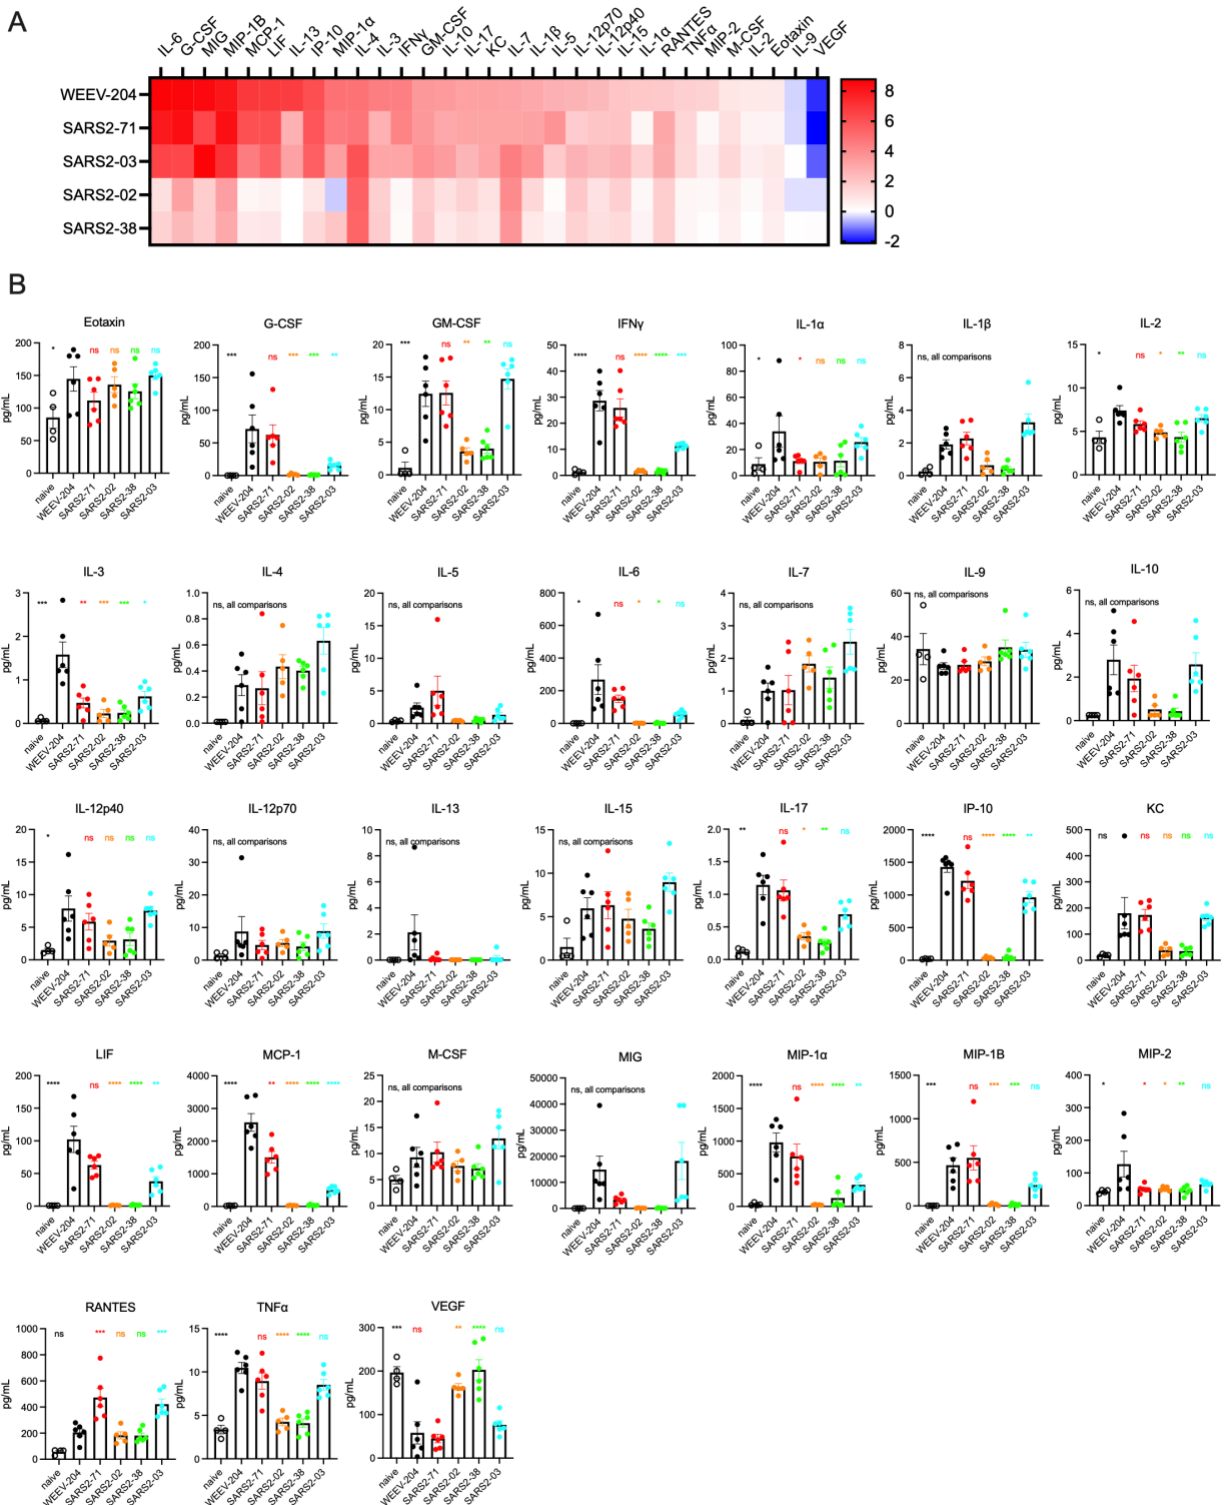

**Figure S3. Cytokine and chemokine levels in the lungs of SARS-CoV-2 infected mice following treatment with anti-SARS-CoV2 mAbs, Related to Figure 4.** Cytokine and chemokine levels in lung homogenates harvested in **Fig 4** were measured by a multiplex platform. **(A)** Heat map showing Log<sub>2</sub> fold change in cytokine and chemokine levels compared to lungs from mock-infected animals. **(B)** Levels of each cytokine and chemokine are plotted. Data are from two experiments, n = 5-6 per group. Error bars represent SEM. One-way ANOVA with Dunnett's post-test: ns, not significant, \*p < 0.05, \*\*p < 0.01, \*\*\*p < 0.001, \*\*\*\*p < 0.0001.)

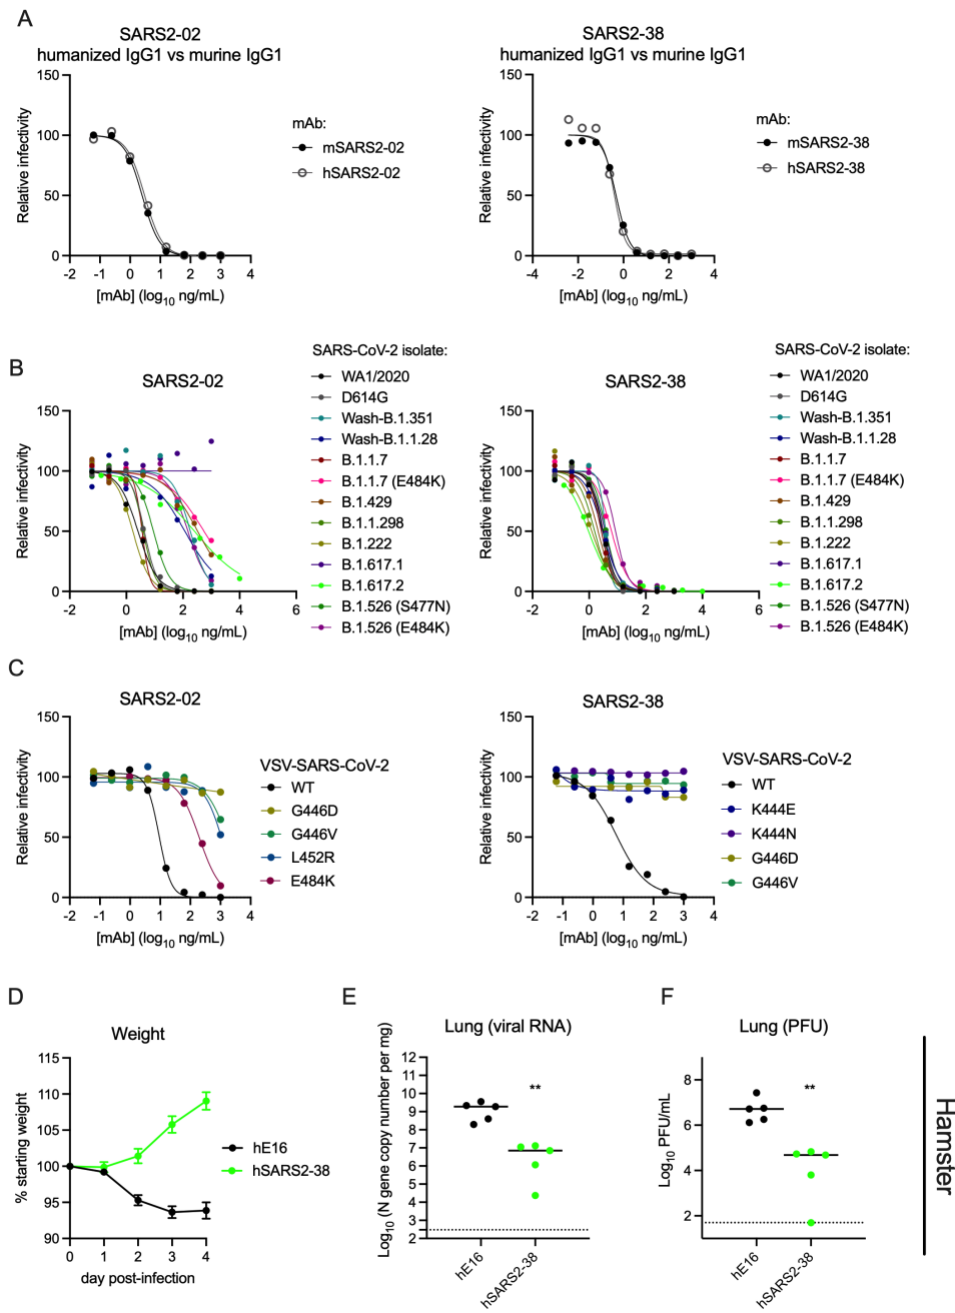

**Figure S4. Neutralization of SARS-CoV-2 variants and *in vivo* protection by SARS2-38 and SARS2-02, Related to Figures 4 and 5.** (A) Anti-SARS-CoV-2 chimeric mouse Fv/human IgG1 Fc mAbs were assayed for neutralization by FRNT against SARS-CoV-2 WA/2020. m, mouse hybridoma-derived mAb, and h, recombinant chimeric mAb. Representative dose response curves are shown. Data are from three experiments. (B) Representative dose response curves of neutralization of SARS-CoV-2 variants by SARS2-02 and SARS2-38. Mean EC50 values from all independent experiments are shown in Fig 5. (C) Representative dose response curves of SARS2-02 and SARS2-38 neutralization of VSV-eGFP-SARS-CoV-2-S and the indicated neutralization-resistant mutants. Data is from of one of two experiments. (D-F) Syrian golden hamsters were administered 1 mg (~10 mg/kg) of the indicated mAb and 24 h later they were infected with  $5 \times 10^5$  PFU of SARS-CoV-2 Wash-B.1.351. (D) Mean weight change. Error bars represent SEM. (E-F) At 4 dpi, lungs were collected and the level of viral RNA (E) and infectious virus (F) was determined (Mann Whitney test,  $**p < 0.01$ ). Median value is shown. Data are from one experiment; n = 5 for all groups.

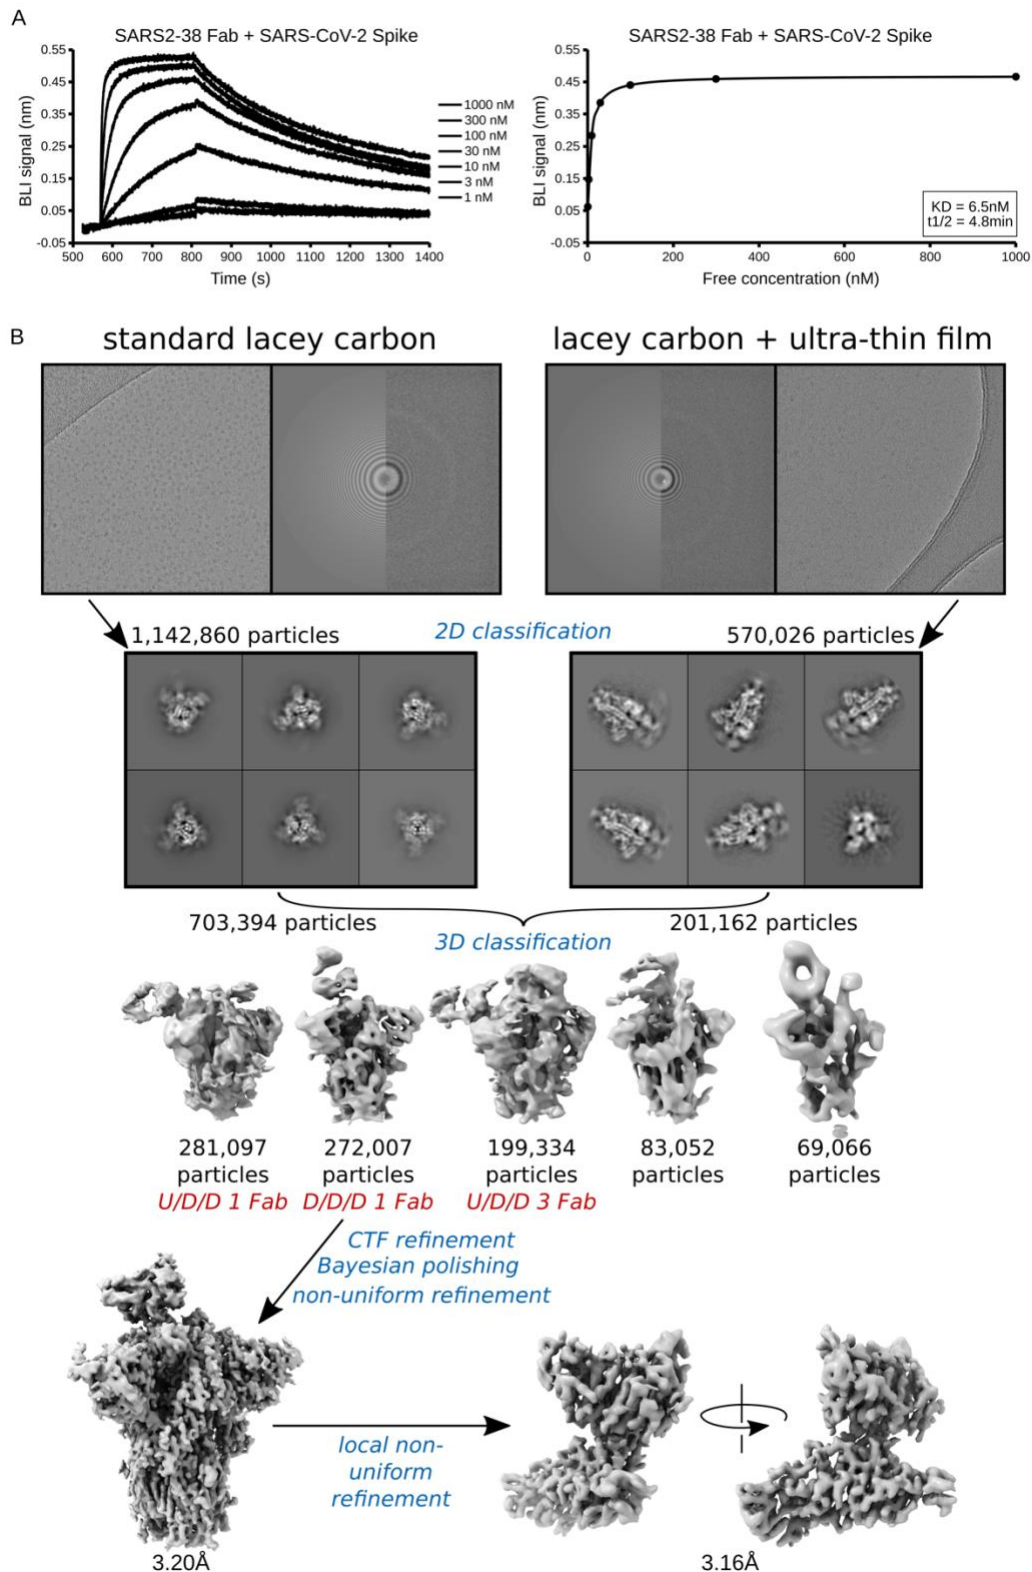

**Figure S5. Binding analysis and cryo-EM data processing pipeline, Related to Figure 6. (A)** Bi-layer interferometry signal (left) and steady state analysis (right) of SARS2-38 Fab interacting with immobilized SARS-CoV-2 spike. Kinetic values were fitted to a 1:1 binding model with a drifting baseline. **(B)** Flowchart depicting data processing steps for global reconstruction of SARS2-38 Fv bound to trimeric spike and local refinement of SARS2-38 Fv bound to RBD.

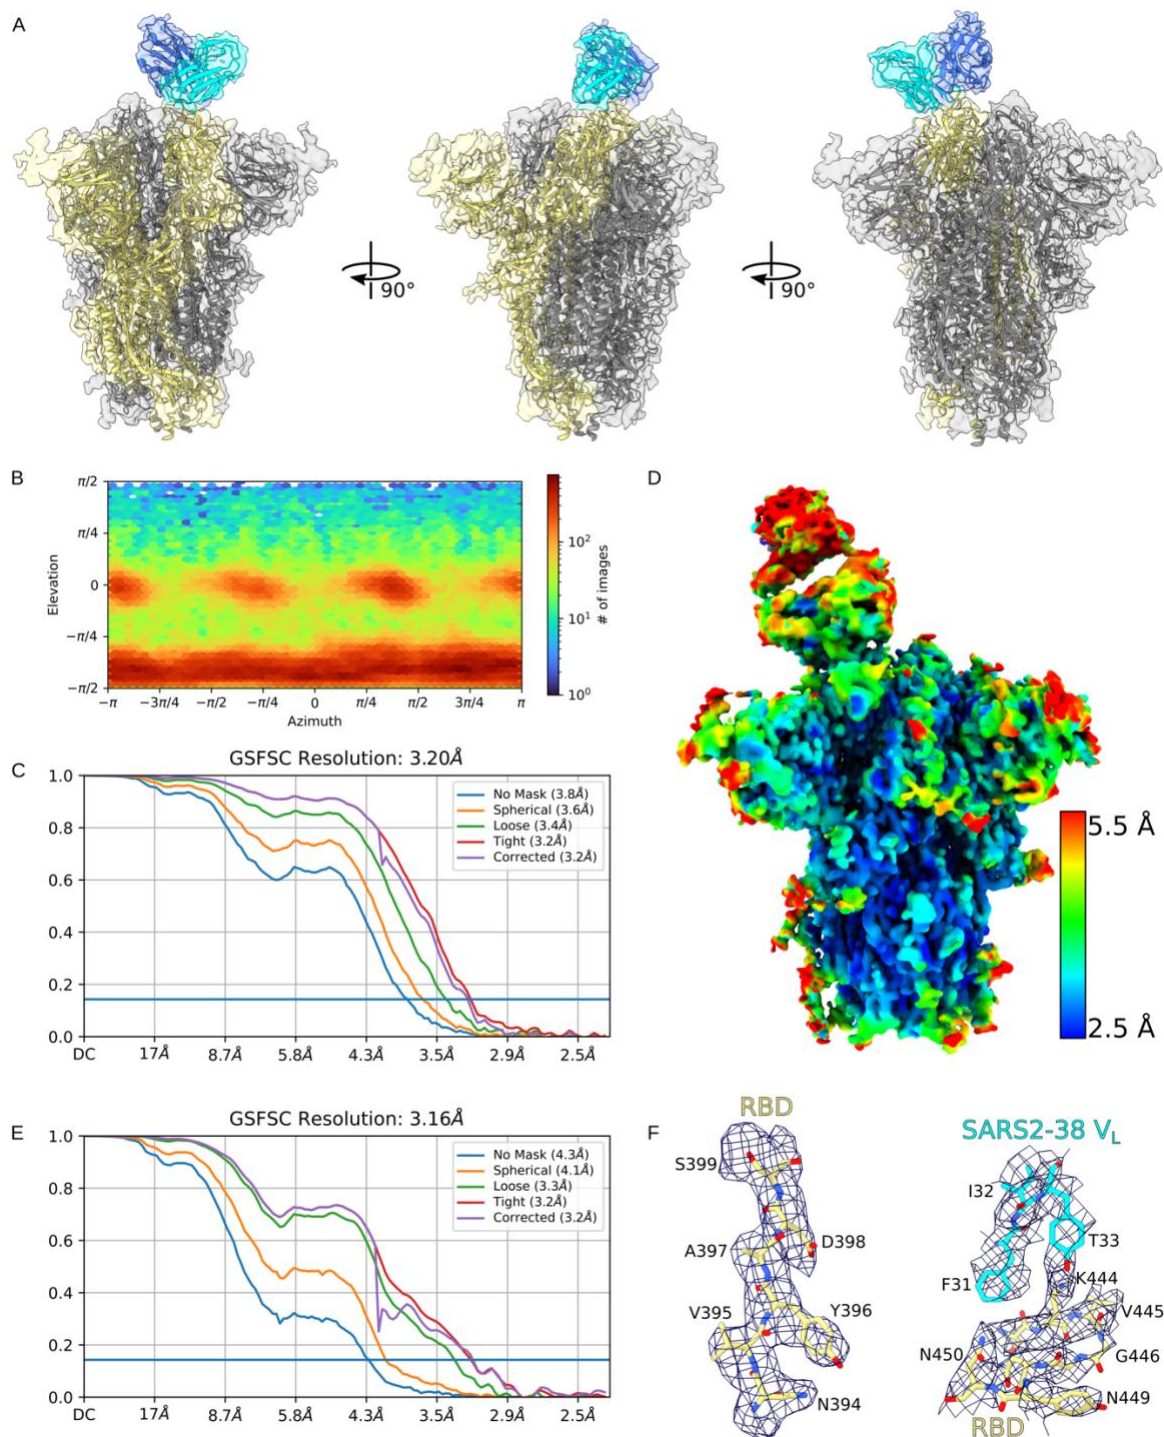

**Figure S6. Validation of global and local cryo-EM reconstructions of SARS2-38 Fv bound to SARS-CoV-2 spike/RBD, Related to Figure 6.** (A) Density map and fitted model of SARS2-38 Fv bound to trimeric SARS-CoV-2 spike. The spike monomer bound by SARS2-38 is shown in yellow, with the rest of the trimer colored gray. The SARS2-38 heavy chain is shown in royal blue, and the light chain in cyan. (B) Orientational distribution assigned to particles in global refinement of SARS2-38 Fv bound to trimeric spike. (C) GSFSC curve for global refinement of SARS2-Fv bound to trimeric spike. (D) Local resolution map for global refinement of SARS2-38 Fv bound to trimeric spike. (E) GSFSC curve for local refinement of SARS2-Fv bound to RBD. (F) Example density and model fits for an RBD beta strand (left) and at the SARS2-38/RBD interface (right). RBD, yellow; SARS2-38 light chain, cyan.

**Table S1. Cryo-EM data collection, processing, and model refinement statistics, Related to Figure 6.**

|                                            | SARS-CoV-2 spike +<br>Fv SARS2-38 (full)<br>PDB 7MKL<br>EMD-23898 | SARS-CoV-2 RBD +<br>Fv SARS2-38 (local)<br>PDB 7MKM<br>EMD-23899 |
|--------------------------------------------|-------------------------------------------------------------------|------------------------------------------------------------------|
| <b>Data collection</b>                     |                                                                   |                                                                  |
| Magnification                              | 59,000x                                                           | 59,000x                                                          |
| Exposure (e <sup>-</sup> /Å <sup>2</sup> ) | 50                                                                | 50                                                               |
| Defocus range (μm)                         | 0.8-2.3                                                           | 0.8-2.3                                                          |
| Pixel size (Å/pixel)                       | 1.16                                                              | 1.16                                                             |
| <b>Data processing</b>                     |                                                                   |                                                                  |
| Initial particles (no.)                    | 1,712,886                                                         | 1,712,886                                                        |
| Final particles (no.)                      | 272,007                                                           | 272,007                                                          |
| Nominal resolution (Å)                     | 3.20                                                              | 3.16                                                             |
| FSC threshold                              | 0.143                                                             | 0.143                                                            |
| <b>Model refinement</b>                    |                                                                   |                                                                  |
| Adapted PDB models                         | 6M0J, 1KIQ, 5XJM, 6VXX                                            | 6M0J, 1KIQ, 5XJM                                                 |
| Model resolution (Å)                       | 4.1                                                               | 4.2                                                              |
| FSC threshold                              | 0.5                                                               | 0.5                                                              |
| Model composition                          |                                                                   |                                                                  |
| Non-hydrogen atoms                         | 25,597                                                            | 3,192                                                            |
| Residues                                   | 3,164                                                             | 406                                                              |
| Ligands                                    | 63                                                                | 1                                                                |
| B-factors (Å <sup>2</sup> )                |                                                                   |                                                                  |
| Residues                                   | 96.29                                                             | 54.21                                                            |
| Ligands (glycans)                          | 116.22                                                            | 76.57                                                            |
| Bonds (RMSD)                               |                                                                   |                                                                  |
| Length (Å)                                 | 0.004                                                             | 0.0032                                                           |
| Angles (°)                                 | 0.782                                                             | 0.806                                                            |
| Validation                                 |                                                                   |                                                                  |
| Molprobit score                            | 1.66                                                              | 1.55                                                             |
| Clash score                                | 9.83                                                              | 7.53                                                             |
| Rotamer outliers (%)                       | 0.00                                                              | 0.00                                                             |
| Ramachandran                               |                                                                   |                                                                  |
| Favored (%)                                | 97.19                                                             | 97.25                                                            |
| Allowed (%)                                | 2.81                                                              | 2.75                                                             |
| Outliers (%)                               | 0.0                                                               | 0.0                                                              |

Respective statistics are provided for local and global refinements of SARS2-38 Fv bound to SARS-CoV-2 RBD/spike.



**Table S2. Close contacts and buried surface area of SARS2-38/RBD interface, Related to Figure 6.**

| RBD epitope residue | SARS2-38 residue (no. close contacts)                            | Buried surface area, Å <sup>2</sup> (% of interface) |
|---------------------|------------------------------------------------------------------|------------------------------------------------------|
| T345                | -                                                                | 3.9 (0.7%)                                           |
| N439                | -                                                                | 7.3 (1.4%)                                           |
| N440                | N91 <sup>L</sup> (6)                                             | 65.1 (12.3%)                                         |
| L441                | S30 <sup>L</sup> (3), F31 <sup>L</sup> (2), N91 <sup>L</sup> (3) | 64.1 (12.1%)                                         |
| D442                | F31 <sup>L</sup> (2)                                             | 7.9 (1.5%)                                           |
| S443                | F31 <sup>L</sup> (1), N91 <sup>L</sup> (1)                       | 20.6 (3.9%)                                          |
| K444                | F31 <sup>L</sup> (1), Y33 <sup>L</sup> (3), W90 <sup>L</sup> (3) | 85.8 (16.2%)                                         |
| V445                | W90 <sup>L</sup> (4), Y93 <sup>L</sup> (1)                       | 102.3 (19.3%)                                        |
| G446                | -                                                                | 21.0 (4.0%)                                          |
| N448                |                                                                  | 2.6 (0.5%)                                           |
| Y449                | R100 <sup>H</sup> (7)                                            | 50.1 (9.4%)                                          |
| N450                | R100 <sup>H</sup> (1)                                            | 29.3 (5.5%)                                          |
| Y451                |                                                                  | 4.3 (0.8%)                                           |
| P499                | -                                                                | 39.3 (7.4%)                                          |
| T500                | Y58 <sup>H</sup> (1)                                             | 27.1 (5.1%)                                          |

RBD epitope residues were determined via PISA solvent exclusion analysis. Close contact residues of mAb SARS2-38 are listed for each RBD residue, with the number of pairwise atomic contacts noted for each interaction ( $< 3.9 \text{ \AA}$  cutoff). SARS2-38 residues are superscripted to delineate light chain (L) and heavy chain (H) residues. Buried surface area was calculated using the Shrake-Rupley algorithm as implemented in the MDTraj python library.

**Table S3. Summary of mAbs that bind similar or proximal epitopes to SARS2-38 and associated structural and functional data, Related to Figures 6 and 7.**

| mAb       | Structural binding site                                          | Functional Residues                                                                                                                             | in vivo studies (prophylaxis & therapeutic)                                                                                                                                                                                                   | Neutralization potency (authentic virus [AV] or pseudovirus [PV]) | Mechanism of action                        | Variant neutralization (authentic virus [AV] or pseudovirus [PV])                                                                                                       | References (Published)                                                                            | References (Preprint) |
|-----------|------------------------------------------------------------------|-------------------------------------------------------------------------------------------------------------------------------------------------|-----------------------------------------------------------------------------------------------------------------------------------------------------------------------------------------------------------------------------------------------|-------------------------------------------------------------------|--------------------------------------------|-------------------------------------------------------------------------------------------------------------------------------------------------------------------------|---------------------------------------------------------------------------------------------------|-----------------------|
| SARS2-38  | 345, 439-446, 448-451, 499-500                                   | VSV-SARS-CoV-2 escape: K444E/N, G446D/V                                                                                                         | Prophylactic and therapeutic protection in K18-ACE2 transgenic mice following infection with WA1/2020, B.1.351 (Wash-B.1.351 Spike chimeric virus), and B.1.617.1                                                                             | 5 ng/mL (AV), 6 ng/mL (PV-VSV)                                    | ACE2 blocking                              | Neutralizes (AV): B.1.1.7, B.1.429, B.1.1.28, B.1.351, B.1.222, B.1.1.298, B.1.617.1, B.1.617.2, B.1.526+S477N, B.1.526+E484K, B.1.1.7+E484K                            | This paper                                                                                        |                       |
| 2H04      | 337, 339-340, 343-346, 356, 439-445, 448, 450, 499, 509          | VSV-SARS-CoV-2 escape: T345A/N/S, R346G, L441R, K444R,                                                                                          | Prophylactic protection in K18-ACE2 transgenic mice following infection with WA1/2020                                                                                                                                                         | 279 ng/mL (AV)                                                    | Non-ACE2 blocking                          |                                                                                                                                                                         | Alsoussi et al., 2020; Liu et al., 2021                                                           |                       |
| REGN10987 | 346, 439-441, 443-450, 498-501                                   | Mutational analysis/yeast display: N439, N440, K444, V445, G446, G447, N448, N439, N440, P499                                                   | Cocktail of REGN1098+REGN10933 protects against N501Y/D614G, B.1.1.7, B.1.351, and B.1.1.28 in K18-ACE2 transgenic mice (prophylaxis and post-exposure therapy) and in 129S mice (prophylaxis)                                                | 12ng/mL/4.21E-11 M (AV); 4.06E-11 (PV-VSV)                        | ACE2 blocking                              | Neutralizes (AV): B.1.1.7, B.1.351, B.1.1.28; Decreased potency against (AV) B.1.429, B.1.617.1, B.1.526, and (PV) N349K                                                | Chen et al., 2021c; Hansen et al., 2020; Thomson et al., 2021                                     |                       |
| S309      | 333-335, 337, 339-341, 343-346, 354, 356-361, 440-441, 444. 509  | Mutational analysis/yeast display: P337, E340<br><br>VSV-SARS-CoV-2 escape: E340A/K/G, P337L<br><br>Authentic SARS-CoV-2 escape: E340A          | Cocktail of S309+S2E12 protects against N501Y/D614G, B.1.1.7, B.1.351, and B.1.1.28 in K18-ACE2 transgenic mice (prophylaxis and post-exposure therapy) and in 129S mice (prophylaxis)                                                        | 79 ng/mL (AV)                                                     | Non-ACE2 blocking                          | Neutralizes (AV): B.1.351, B.1.1.28, B.1.429, B.1.617.1, B.1.526, and (PV) N439K; Reduced neutralization of B.1.1.7 (variably), E484K+N501Y+D614G and (PV-MLV) SARS-CoV | Chen et al., 2021c; Chen et al., 2021d; Pinto et al., 2020; Starr et al., 2021; Wang et al., 2021 |                       |
| COV2-2130 | 345-346, 439-441, 443-447, 449-450, 452, 484, 490. 492-494, 499  | Mutational analysis/yeast display: R346, K444, G447, N448<br><br>VSV-SARS-CoV-2 escape: K444R/E<br><br>Authentic SARS-CoV-2 escape: N74K, R346I | Cocktail of COV2-2130+COV2-2196 protects against N501Y/D614G, B.1.1.7, B.1.351, and B.1.1.28 in K18-ACE2 transgenic mice (prophylaxis and post-exposure therapy) and in 129S mice (prophylaxis) and against B.1.351 in hamsters (prophylaxis) | 26 ng/mL (AV)                                                     | ACE2 blocking                              | Neutralizes (AV): B.1.1.7, B.1.351, B.1.1.28, and B.1.526; slightly decreased potency against B.1.429, B.1.617.1, and E484K/D614G                                       | Chen et al., 2021c                                                                                | Dong et al., 2021     |
| C110      | 344-347, 351, 441-442, 448-452, 470, 490, 492, 494, 498-500, 509 |                                                                                                                                                 | Prophylactic protection against mouse-adapted SARS-CoV-2 in BALB/c mice                                                                                                                                                                       | 18 ng/mL (PV - HIV)                                               | May sterically interfere with ACE2 binding |                                                                                                                                                                         | Barnes et al., 2020; Robbiani et al., 2020; Schäfer et al., 2021                                  |                       |

|           |                                                                                                                                                                     |                                                                                                                                 |                                                                                                                                                                                                                                                                                                                                                                                                                               |                                          |                                                                                       |                                                                                                                                |                                                                  |                       |
|-----------|---------------------------------------------------------------------------------------------------------------------------------------------------------------------|---------------------------------------------------------------------------------------------------------------------------------|-------------------------------------------------------------------------------------------------------------------------------------------------------------------------------------------------------------------------------------------------------------------------------------------------------------------------------------------------------------------------------------------------------------------------------|------------------------------------------|---------------------------------------------------------------------------------------|--------------------------------------------------------------------------------------------------------------------------------|------------------------------------------------------------------|-----------------------|
| C119      | 403, 405, 444-450, 452-453, 484, 490, 492-495, 497-505                                                                                                              |                                                                                                                                 |                                                                                                                                                                                                                                                                                                                                                                                                                               | 9 ng/mL (PV - HIV)                       | ACE2 blocking                                                                         |                                                                                                                                | Barnes et al., 2020; Robbiani et al., 2020; Schäfer et al., 2021 |                       |
| COVO X-75 | 417, 421, 453, 455-458, 473-480, 484-489, 493                                                                                                                       |                                                                                                                                 |                                                                                                                                                                                                                                                                                                                                                                                                                               |                                          |                                                                                       |                                                                                                                                | Dejnirattisai et al., 2021                                       |                       |
| 2-7       | 345-346, 439-450, 498-503, 506                                                                                                                                      |                                                                                                                                 |                                                                                                                                                                                                                                                                                                                                                                                                                               | 3 ng/mL (AV), 10 ng/mL (PV-VSV)          | ACE2 blocking                                                                         | Neutralizes (PV): B.1.1.7, B.1.351                                                                                             | Cerutti et al., 2021; Liu et al., 2020; Wang et al., 2021        |                       |
| BG10-19   | 335, 338, 339, 342-346, 367, 368, 371, 373, 374, 437-439, 440-446, 478, 450-451, 499, 500, 509, and NTD glycan at N165 (Quaternary epitope bridging 2 RBDs and NTD) | VSV-SARS-CoV-2 escape: L441P, G339R                                                                                             |                                                                                                                                                                                                                                                                                                                                                                                                                               | 33 ng/mL (AV), 9 ng/mL (PV-HIV)          | inhibits exposure of the ACE2 RBM, by locking the S trimer into a closed conformation | Neutralizes (PV): B.1.1.7, B.1.351, SARS-CoV, PVs with single amino acid changes from VOCs (R683G, N439K, Y453F, N501Y, R346S) | Scheid et al., 2021                                              |                       |
| BG7-15    | 439-44, 443-450, 452, 490, 492-494, 499, 500, 506                                                                                                                   | Mutational analysis (binding RBD mutants by ELISA): V445E, Q498Y/P499T PV neutralization: K444Q, V445E, N439K (slight decrease) |                                                                                                                                                                                                                                                                                                                                                                                                                               | 114 ng/mL (AV), 16 ng/mL (PV-HIV)        | Sterically hinders ACE2 binding                                                       | Neutralizes (PV): B.1.1.7, B.1.351, PV with single amino acid change N439K (with some decrease in potency)                     | Scheid et al., 2021                                              |                       |
| DH1047    | 368-372, 374-381, 383, 384, 404, 405, 407-409, 414-416, 435, 499, 501-506, 508                                                                                      |                                                                                                                                 | SARS-CoV-2 (Cynomolgus macaques, 10mg/kg, prophylaxis); SARS-CoV-2 B.1.351 (aged mouse model, prophylactic protection, therapeutic administration reduced viral titers in lung and lung pathology but not weight loss) and cross-protection against WIV1-CoV (in HFH4-ACE2-transgenic mice, administered 12 h pre or post-infection; 300ug Ab); SARS-CoV (MA15 model, prophylaxis and 12 h post-infection, 10mg/kg); RsSHC014 | 398 ng/mL (AV), 90 ng/mL (PV-lentivirus) | ACE2 blocking                                                                         | Neutralizes (AV and PV):B.1.1.7, B.1.429, B.1.351, SARS-CoV, WIV-1, RsSHC014                                                   | Li et al., 2021a                                                 | Martinez et al., 2021 |
| S2H97     | 353, 355, 357, 393, 394, 396, 426-430, 459, 460,                                                                                                                    | Mutational analysis (yeast display): N394, Y396, D428, K462,                                                                    |                                                                                                                                                                                                                                                                                                                                                                                                                               | 749 ng/mL (AV), 338 ng/mL (PV-VSV)       |                                                                                       | Neutralizes (PV): SARS-CoV GD-Pangolin, RTG13, GX-Pangolin, WIV-1                                                              |                                                                  | Starr et al., 2021    |

|        |                                                    |                                                                                           |                                                                                          |                                                                     |                  |                                                                                                                                                     |                         |                           |
|--------|----------------------------------------------------|-------------------------------------------------------------------------------------------|------------------------------------------------------------------------------------------|---------------------------------------------------------------------|------------------|-----------------------------------------------------------------------------------------------------------------------------------------------------|-------------------------|---------------------------|
|        | 462-466,<br>514-516, 518                           | S514, E516,<br>L518                                                                       |                                                                                          |                                                                     |                  |                                                                                                                                                     |                         |                           |
| S2x259 | 369-386,<br>404, 407,<br>408, 471,<br>474, 479-481 | Mutational<br>analysis (yeast<br>display):<br>G504<br>VSV-SARS-<br>CoV-2 escape:<br>G504D | Prophylactic<br>protection in Syrian<br>hamster model<br>(Wuhan-1 strain,<br>4mg/kg mAb) | 144 ng/mL (AV),<br>87 ng/mL (PV-<br>MLV), 213 ng/mL<br>(VSV PV-VSV) | ACE2<br>blocking | Neutralizes (PV):<br>B.1.1.7, B.1.351,<br>P.1,<br>B.1.427/B.1.429,<br>N439K, Y453F,<br>Pangolin GD,<br>RaTG13, SARS-<br>CoV, WIV1,<br>WIV16, SHC014 | Thomson et<br>al., 2021 | Tortorici et<br>al., 2021 |
